# Supplementary material for: One-Step Synthesis of Iron and Titanium-Based Compounds Using Black Mineral Sands and Oxalic Acid under Subcritical Water Conditions
Source: MDPI journal article supplement (doi:10.3390/min12030306), 2022-02-28
Supplement: s1 [file s1]

# One-Step Synthesis of Iron and Titanium-Based Compounds Using Black Mineral Sands and Oxalic Acid under Subcritical Water Conditions

Carla S. Valdivieso-Ramírez <sup>1</sup>, Patricia I. Pontón <sup>1</sup>, Anja Dosen <sup>2</sup>, Bojan A. Marinkovic <sup>2,\*</sup> and Victor H. Guerrero <sup>1,\*</sup>

<sup>1</sup> Department of Materials, Escuela Politécnica Nacional, Quito 170525, Ecuador; carla.valdivieso@epn.edu.ec (C.S.V.-R.); patricia.ponton@epn.edu.ec (P.I.P.)

<sup>2</sup> Department of Chemical and Materials Engineering, Pontifical Catholic University of Rio de Janeiro (PUC-Rio), Rio de Janeiro 38097, Brazil; adosen@puc-rio.br

\* Correspondence: bojan@puc-rio.br (B.A.M.); victor.guerrero@epn.edu.ec (V.H.G.)

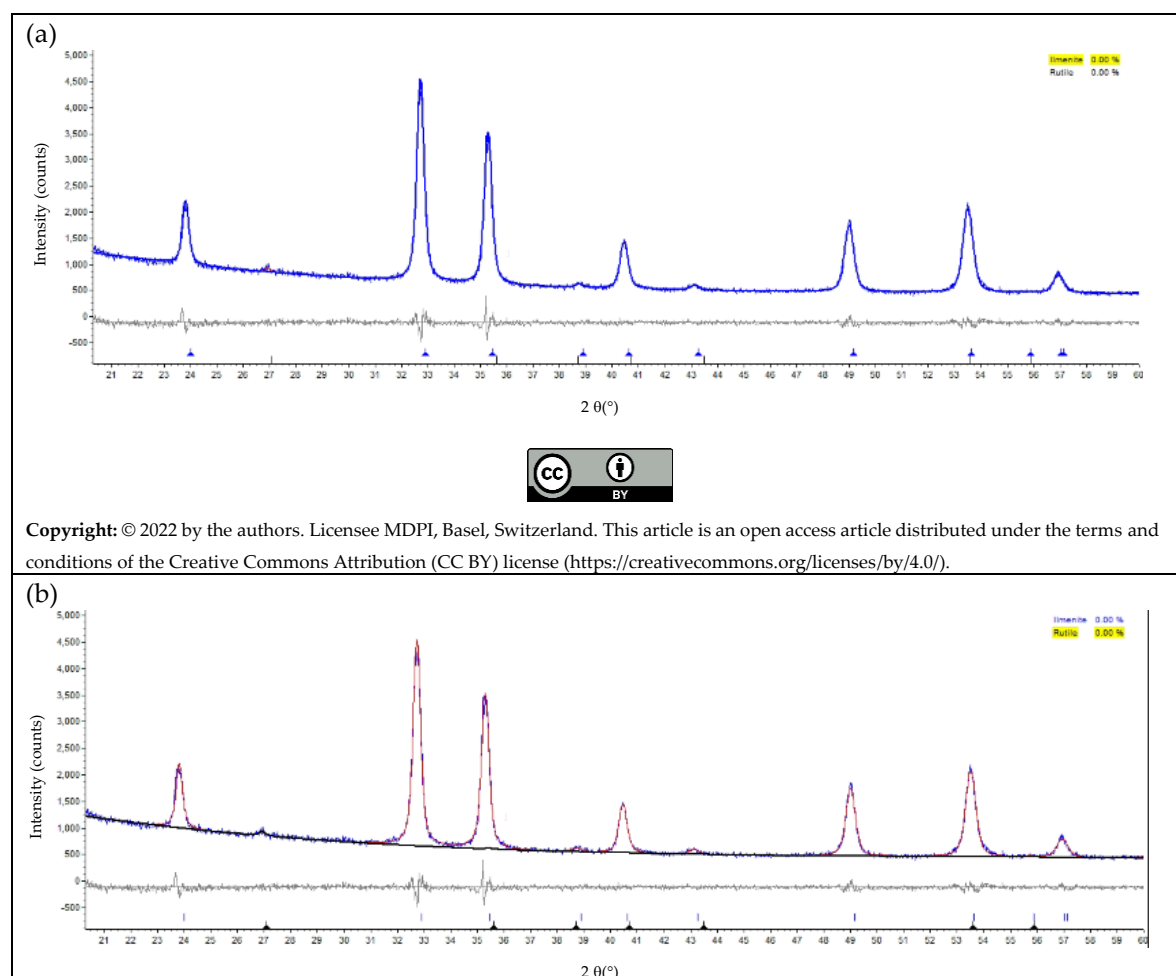

**Figure S1.** Le Bail fitting of SCW sample: (a) the main phase is an ilmenite-hematite solid solution, and (b) the secondary phase is rutile.

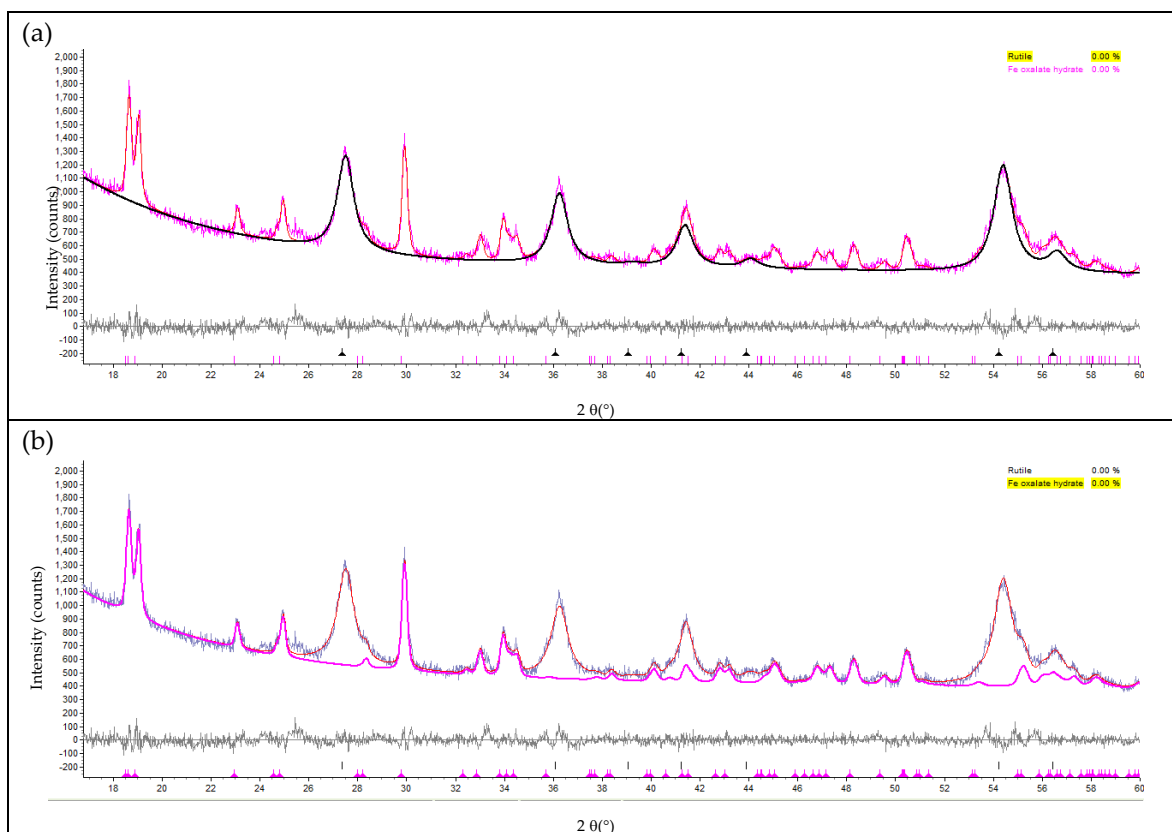

**Figure S2.** Le Bail fitting of WA fraction for 0.1 M, demonstrating the presence of (a) rutile and (b) Fe oxalate hydrate (PDF 23-0293,  $a = 9.84 \text{ \AA}$ ).

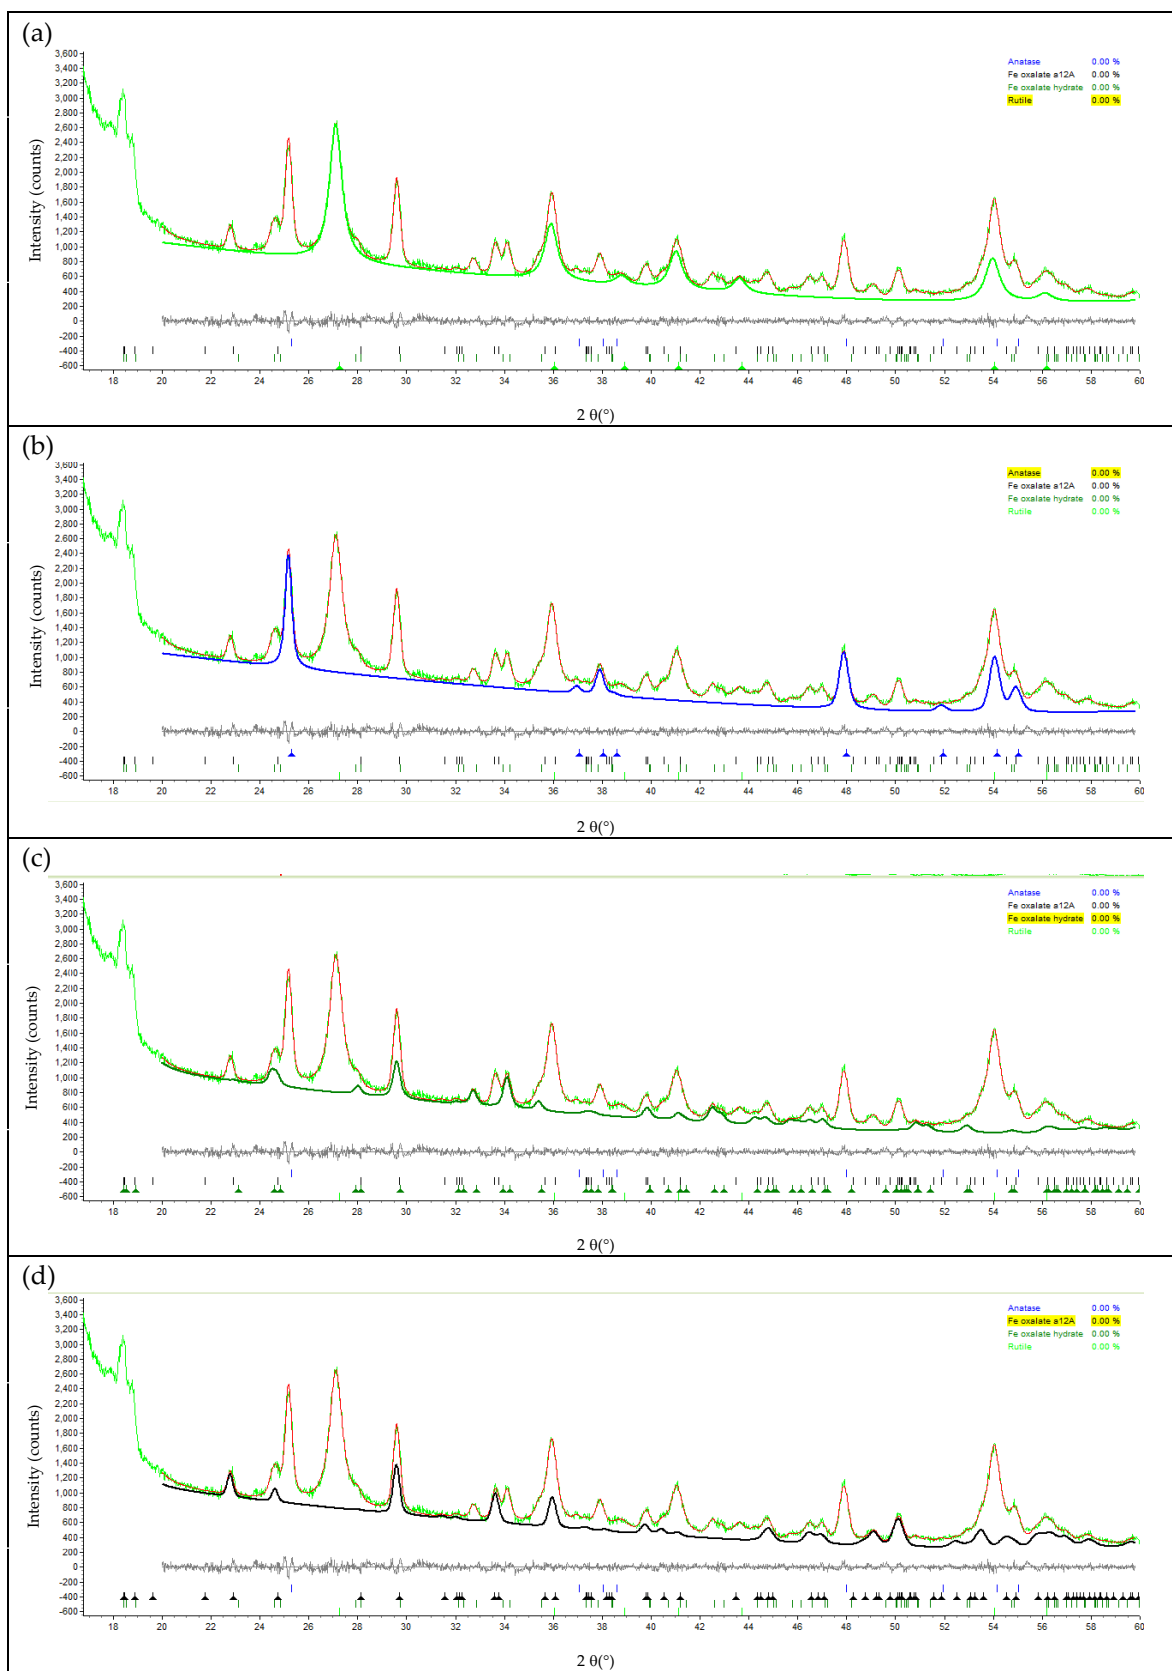

**Figure S3.** Le Bail fitting of WA fraction for 0.5 M, showing the presence of (a) rutile, (b) anatase, (c) ferrous oxalate hydrate (PDF 23-0293,  $a=9.84 \text{ \AA}$ ), and (d) ferrous oxalate hydrate (PDF 72-1305,  $a = 12.06 \text{ \AA}$ ).

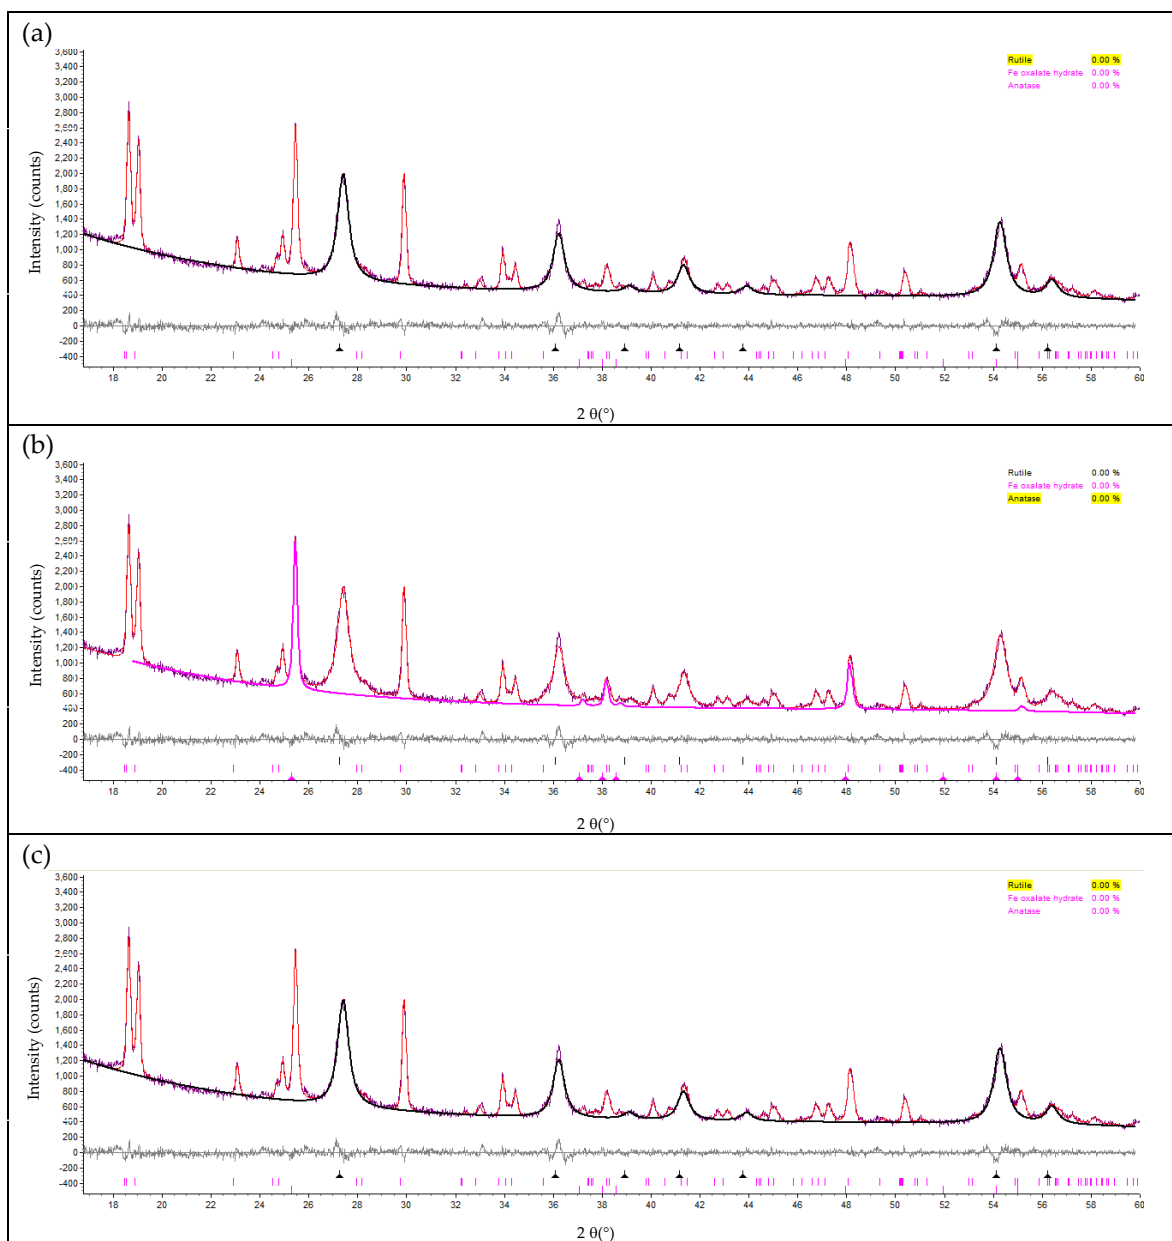

**Figure S4.** Le Bail fitting of WA fraction for 1.0 M, showing the presence of (a) rutile, (b) anatase and (c) ferrous oxalate hydrate (PDF 23-0293,  $a = 9.84 \text{ \AA}$ ).

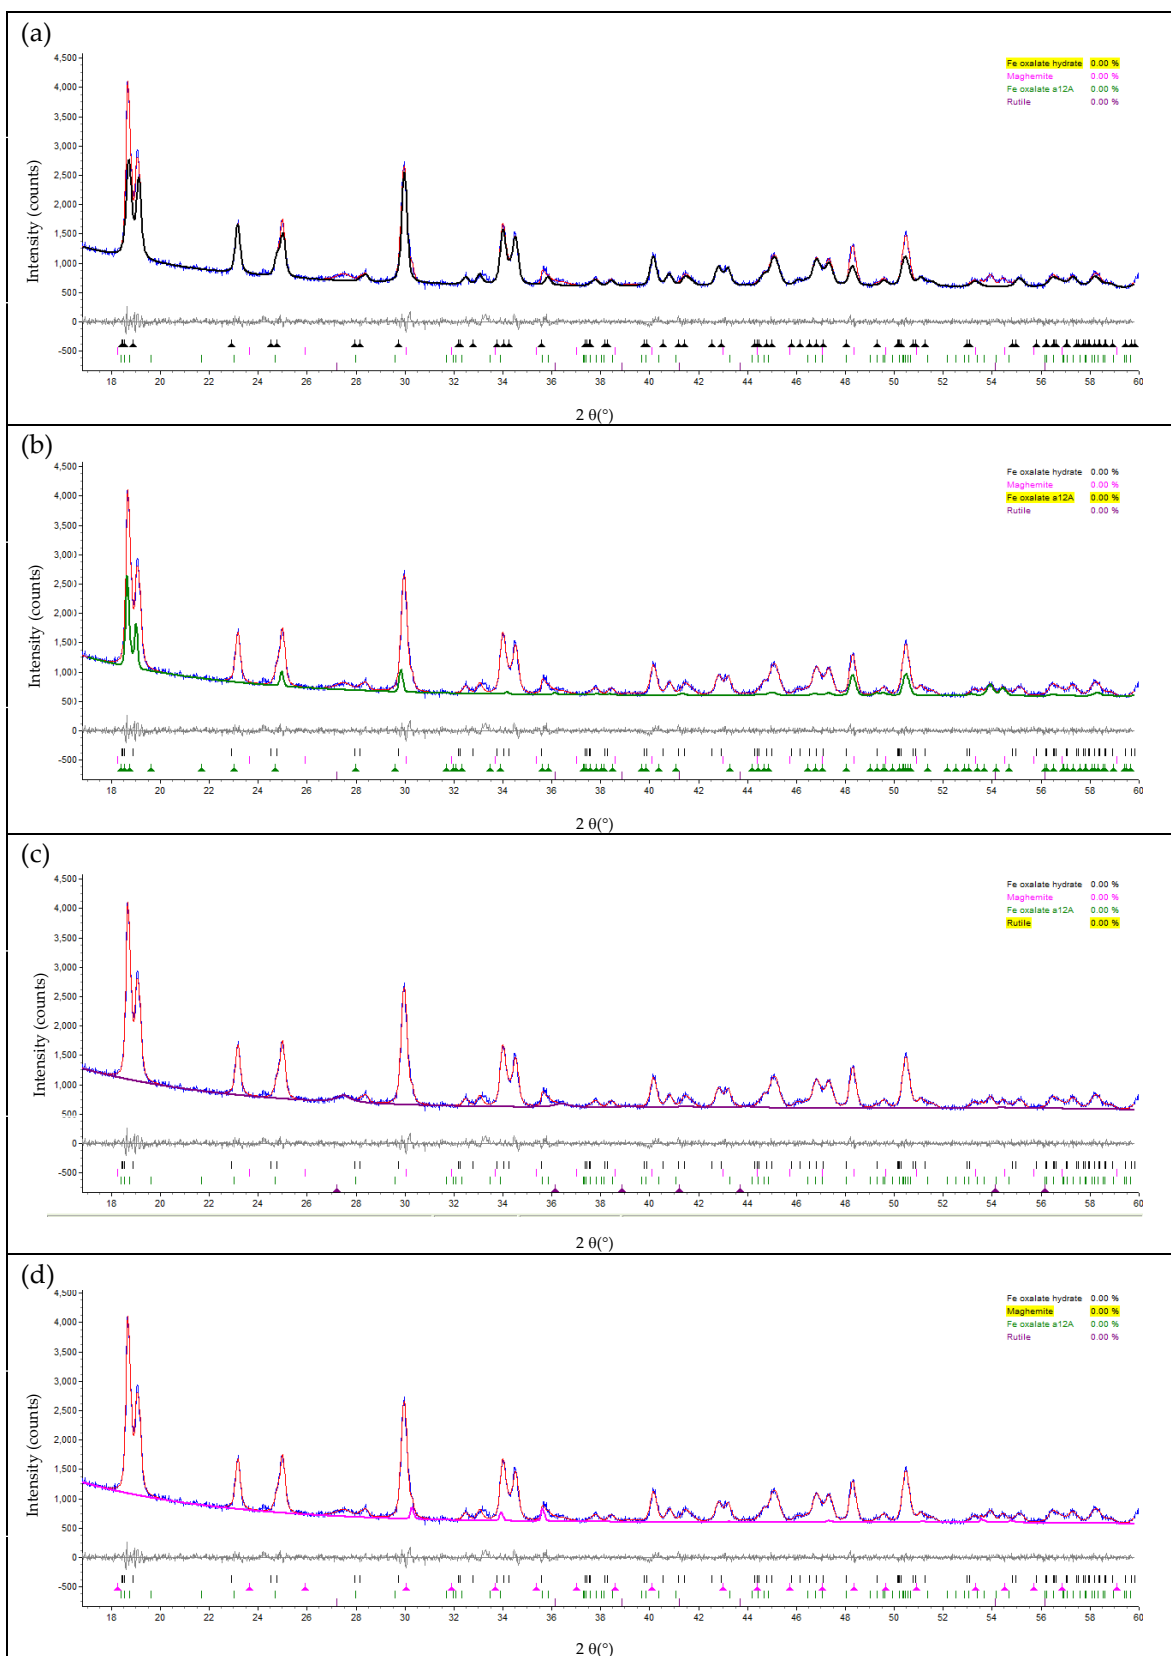

**Figure S5.** Le Bail fitting of WB fraction for 0.1 M, showing the presence of main phases: (a) ferrous oxalate hydrate (PDF 23-0293,  $a = 9.84 \text{ \AA}$ ), (b) ferrous oxalate hydrate (PDF 72-1305,  $a = 12.06 \text{ \AA}$ ), and secondary phases: (c) rutile and (d) maghemite.

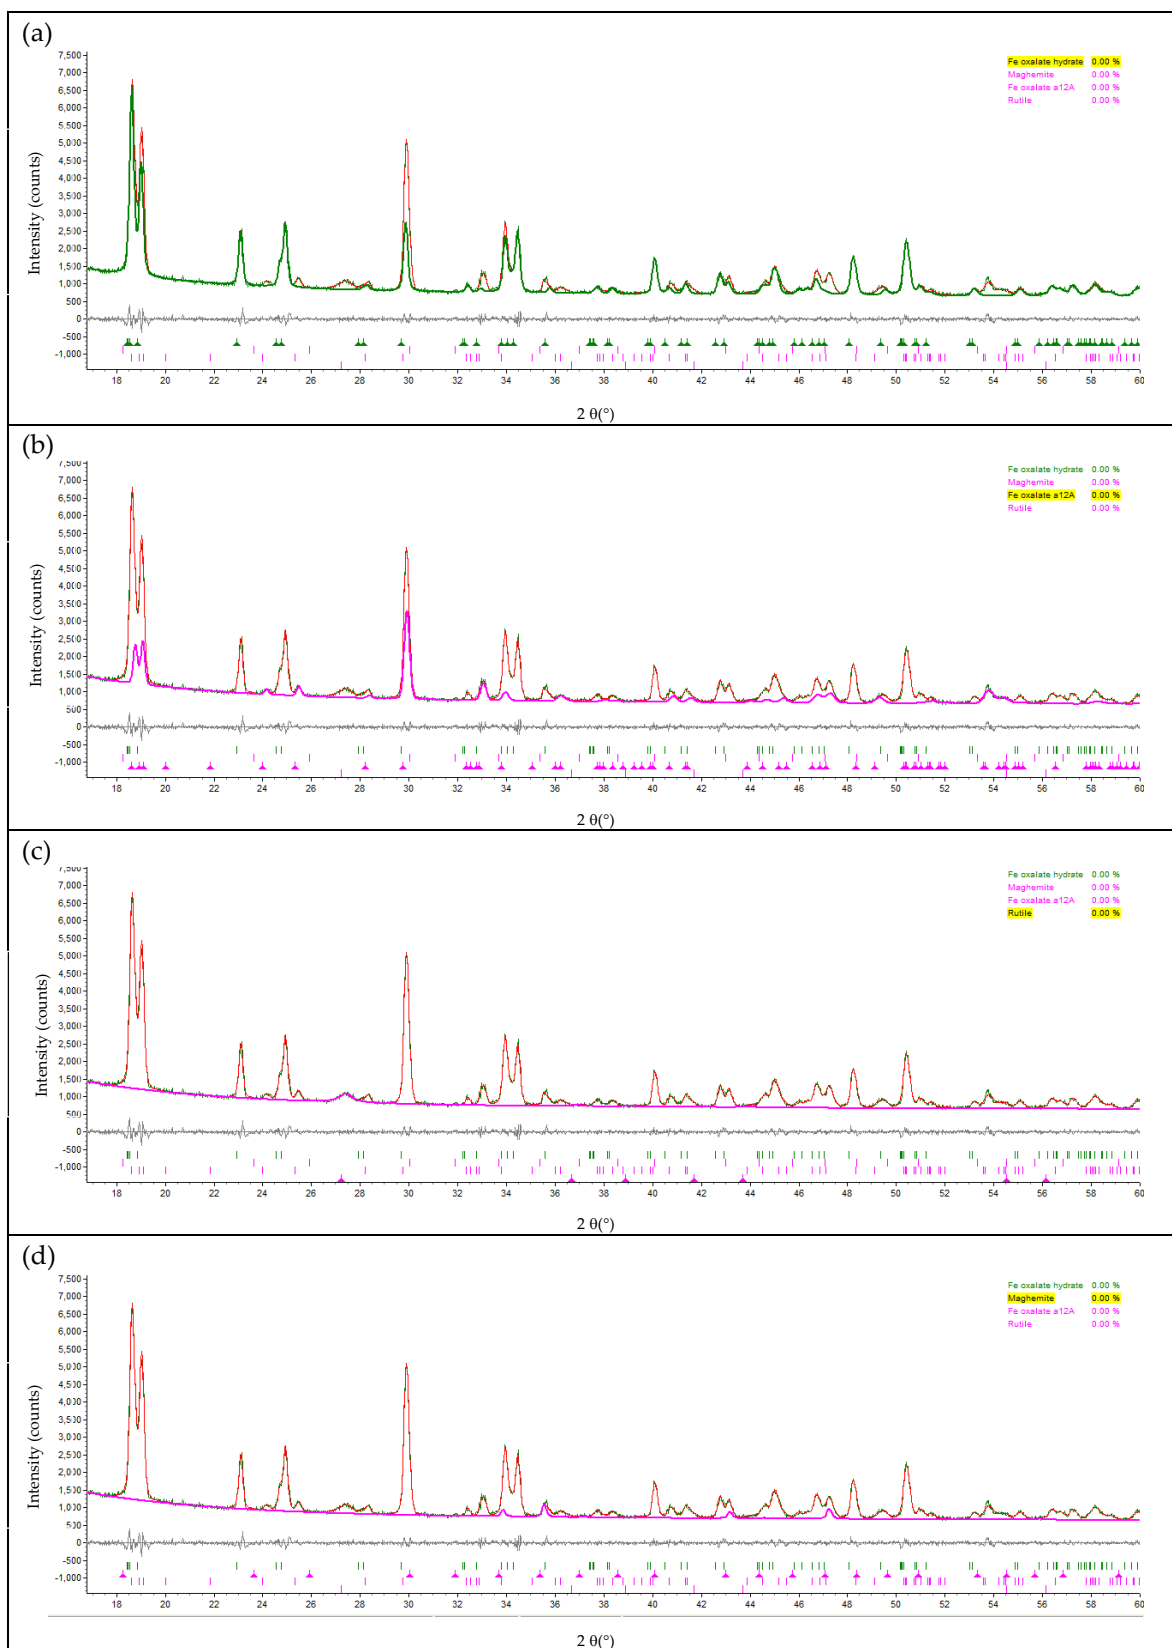

**Figure S6.** Le Bail fitting of WB fraction for 0.5 M, showing the presence of main phases: (a) ferrous oxalate hydrate (PDF 23-0293,  $a = 9.84 \text{ \AA}$ ), (b) ferrous oxalate hydrate (PDF 72-1305,  $a = 12.06 \text{ \AA}$ ), and secondary phases: (c) rutile and (d) maghemite.

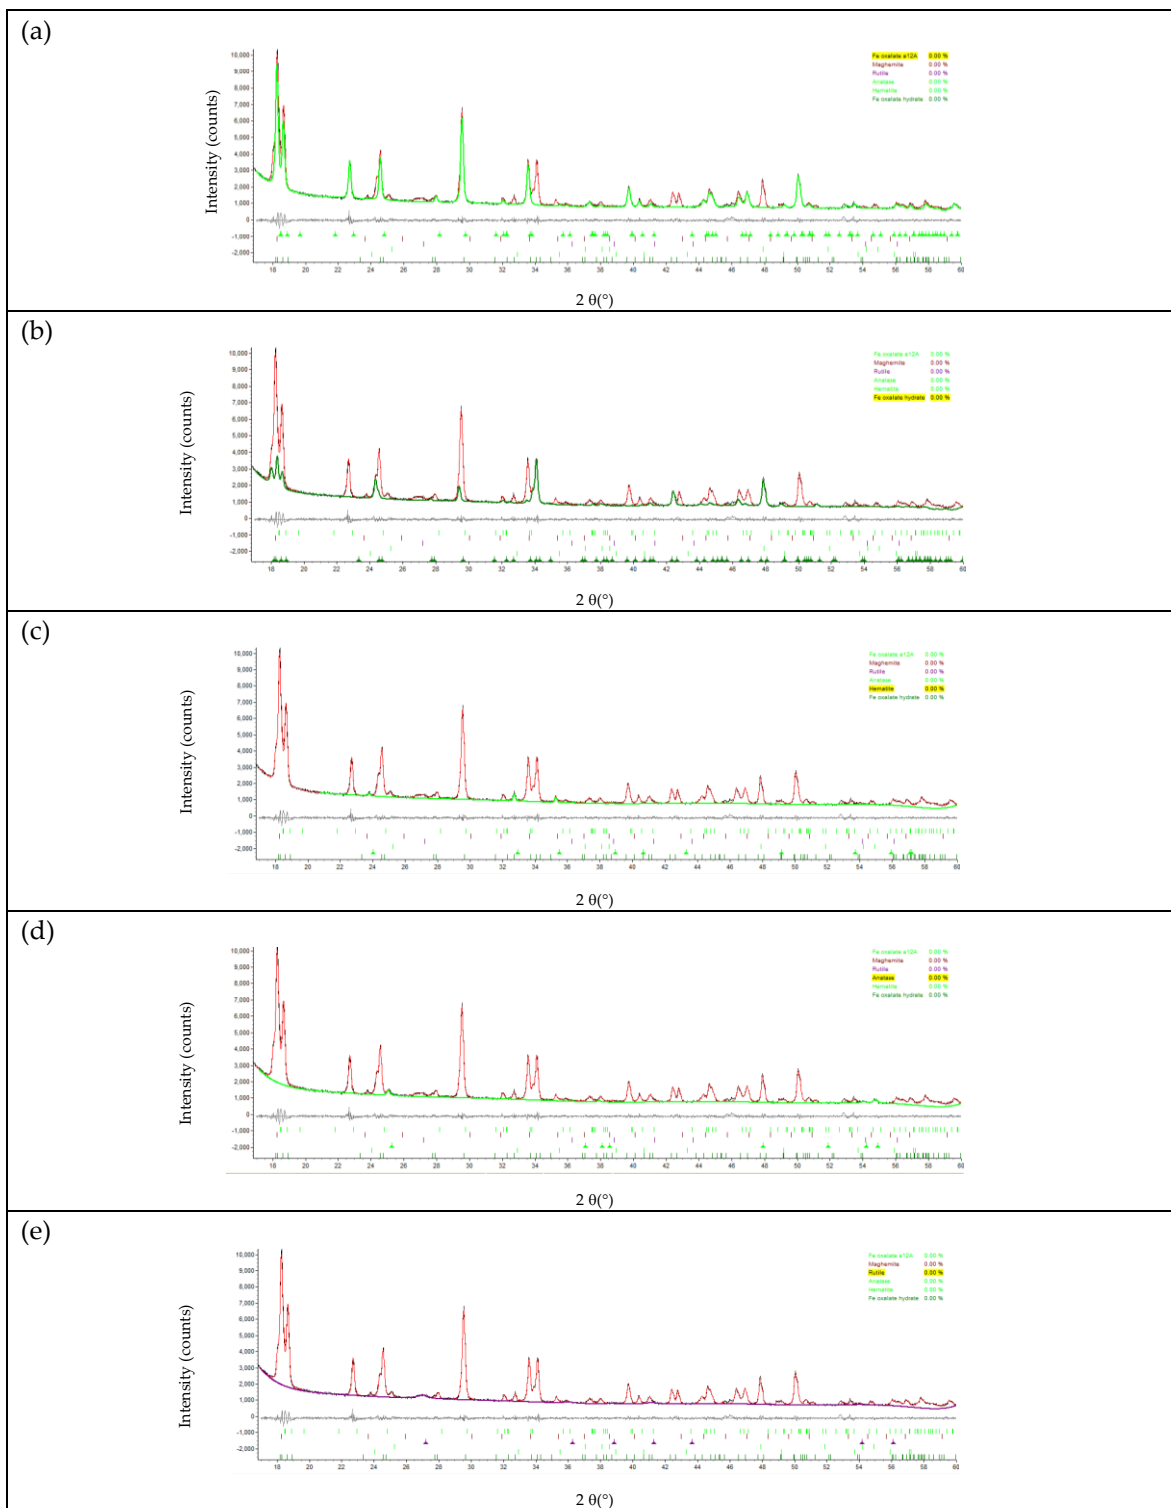

**Figure S7.** Le Bail fitting of WB fraction for 1.0 M, showing the presence of main phases: (a) ferrous oxalate hydrate (PDF 72-1305,  $a = 12.06 \text{ \AA}$ ), (b) ferrous oxalate hydrate (PDF 23-0293,  $a = 9.84 \text{ \AA}$ ), and secondary phases: (c) hematite, (d) anatase and (e) maghemite.

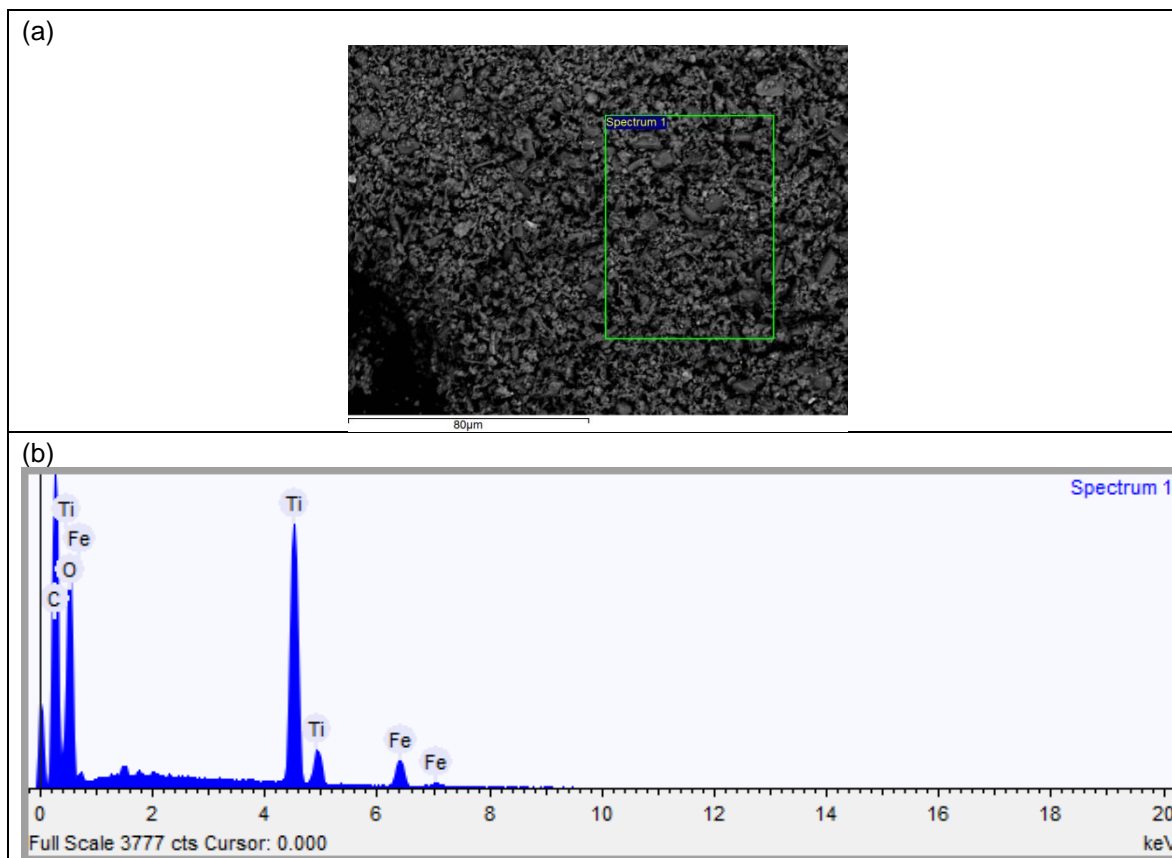



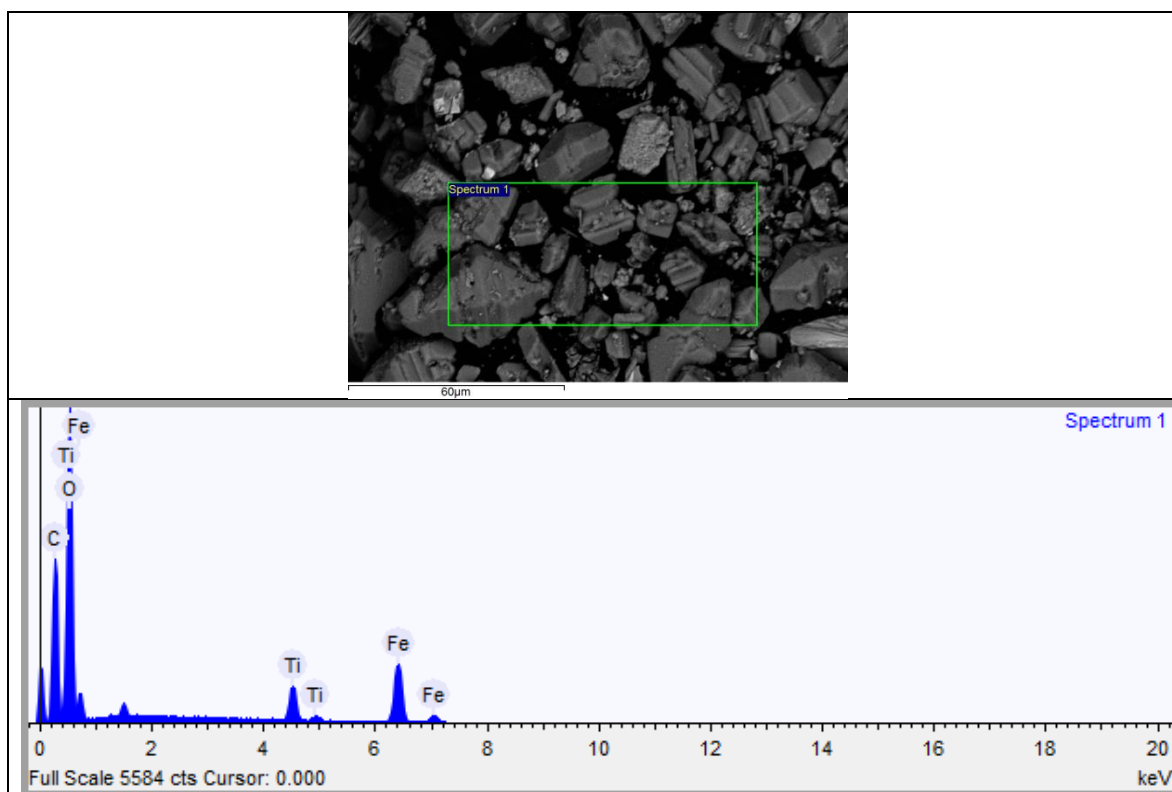

**Figure S9.** (a) EDS mapping and (b) EDS spectrum of WA fraction for 1.0 M.

#### CIF FILES:

##### ANATASE

```
data_global
_chemical_name_mineral 'Anatase'
loop_
 _publ_author_name
 'Howard C J'
 'Sabine T M'
 'Dickson F'
 _journal_name_full 'Acta Crystallographica, Section B'
 _journal_volume 47
 _journal_year 1991
 _journal_page_first 462
 _journal_page_last 468
 _publ_section_title
 ;
 Structural and thermal parameters for rutile and anatase
 ;
 _database_code_amcsd 0019093
 _chemical_compound_source 'Synthetic'
 _chemical_formula_sum 'Ti O2'
 _cell_length_a 3.7845
 _cell_length_b 3.7845
```

```

_cell_length_c 9.5143
_cell_angle_alpha 90
_cell_angle_beta 90
_cell_angle_gamma 90
_cell_volume 136.268
_exptl_crystal_density_diffn    3.894
_symmetry_space_group_name_H-M 'I 41/a m d'
loop_
_space_group_symop_operation_xyz
  'x,y,z'
  '1/2+x,1/2+y,1/2+z'
  '-y,1/2-x,1/4+z'
  '1/2-y,-x,3/4+z'
  '1/2+y,1/2+x,1/2-z'
  '+y,+x,-z'
  '1/2+y,1/2-x,1/2-z'
  '+y,-x,-z'
  '-y,1/2+x,1/4+z'
  '1/2-y,+x,3/4+z'
  '1/2+x,1/2-y,1/2+z'
  '+x,-y,+z'
  '1/2-x,y,3/4-z'
  '-x,1/2+y,1/4-z'
  '1/2+x,y,3/4-z'
  '+x,1/2+y,1/4-z'
  '1/2-x,1/2-y,1/2+z'
  '-x,-y,+z'
  '1/2+y,x,3/4+z'
  '+y,1/2+x,1/4+z'
  '-y,-x,-z'
  '1/2-y,1/2-x,1/2-z'
  '-y,x,-z'
  '1/2-y,1/2+x,1/2-z'
  '1/2+y,-x,3/4+z'
  '+y,1/2-x,1/4+z'
  '-x,y,z'
  '1/2-x,1/2+y,1/2+z'
  'x,1/2-y,1/4-z'
  '1/2+x,-y,3/4-z'
  '-x,1/2-y,1/4-z'
  '1/2-x,-y,3/4-z'
loop_
_atom_site_label
_atom_site_fract_x
_atom_site_fract_y
_atom_site_fract_z
Ti 0.00000 0.00000 0.00000
O 0.00000 0.00000 0.20806
loop_

```

```

_atom_site_aniso_label
_atom_site_aniso_U_11
_atom_site_aniso_U_22
_atom_site_aniso_U_33
_atom_site_aniso_U_12
_atom_site_aniso_U_13
_atom_site_aniso_U_23
Ti 0.00520 0.00000 0.00000 0.00520 0.00000 0.00700
O 0.01170 0.00000 0.00000 0.00270 0.00000 0.00720

```

## RUTILE

```

data_global
_chemical_name_mineral 'Rutile'
loop_
_publ_author_name
'Meagher E P'
'Lager G A'
_journal_name_full 'The Canadian Mineralogist'
_journal_volume 17
_journal_year 1979
_journal_page_first 77
_journal_page_last 85
_publ_section_title
;
Polyhedral thermal expansion in the TiO2 polymorphs: Refinement
of the crystal structure of rutile and brookite at high temperature
Sample at 25 degrees C
;
_database_code_amcsd 0005164
_chemical_formula_sum 'Ti O2'
_cell_length_a 4.593
_cell_length_b 4.593
_cell_length_c 2.959
_cell_angle_alpha 90
_cell_angle_beta 90
_cell_angle_gamma 90
_cell_volume 62.422
_exptl_crystal_density_diffn 4.250
_symmetry_space_group_name_H-M 'P 42/m n m'
loop_
_space_group_symop_operation_xyz
'x,y,z'
'-y,-x,z'
'y,x,-z'
'1/2+y,1/2-x,1/2-z'
'1/2-y,1/2+x,1/2+z'
'1/2+x,1/2-y,1/2+z'
'1/2-x,1/2+y,1/2-z'
'x,y,-z'

```

```

'-x,-y,z'
'y,x,z'
'-y,-x,-z'
'1/2-y,1/2+x,1/2-z'
'1/2+y,1/2-x,1/2+z'
'1/2-x,1/2+y,1/2+z'
'1/2+x,1/2-y,1/2-z'
'-x,-y,-z'
loop_
_atom_site_label
_atom_site_fract_x
_atom_site_fract_y
_atom_site_fract_z
_atom_site_U_iso_or_equiv
Ti 0.00000 0.00000 0.00000 0.00532
O 0.30510 0.30510 0.00000 0.00760
loop_
_atom_site_aniso_label
_atom_site_aniso_U_11
_atom_site_aniso_U_22
_atom_site_aniso_U_33
_atom_site_aniso_U_12
_atom_site_aniso_U_13
_atom_site_aniso_U_23
Ti 0.00695 0.00695 0.00204 -0.00011 0.00000 0.00000
O 0.00823 0.00823 0.00435 -0.00150 0.00000 0.00000

```

## IRON OXALATE HYDRATE

#(C) 2021 by FIZ Karlsruhe - Leibniz Institute for Information Infrastructure. All rights reserved.

```

data_161344-ICSD
_database_code_ICSD 161344
_audit_creation_date 2009-02-01
_audit_update_record 2011-02-01
_chemical_name_common 'Iron oxalate dihydrate'
_chemical_formula_structural 'Fe (C2 O4) (H2 O)2'
_chemical_formula_sum 'C2 H4 Fe1 O6'
_chemical_name_structure_type FeC2O4(H2O)2
_exptl_crystal_density_diffn 2.31
_diffn_ambient_temperature 293.
_citation_title

```

;

Single-crystal X-ray diffraction and spectroscopic studies on humboldtine and lindbergite: weak Jahn-Teller effect of Fe(2+) ion

;

```

loop_
_citation_id
_citation_journal_full

```

```

_citation_year
_citation_journal_volume
_citation_page_first
_citation_page_last
_citation_journal_id_ASTM
primary 'Physics and Chemistry of Minerals' 2008 35 467 475 PCMIDU
loop_
_citation_author_citation_id
_citation_author_name
primary 'Echigo, T.'
primary 'Kimata, M.'
_cell_length_a 12.011(11)
_cell_length_b 5.557(5)
_cell_length_c 9.920(9)
_cell_angle_alpha 90.
_cell_angle_beta 128.53(3)
_cell_angle_gamma 90.
_cell_volume 517.96
_cell_formula_units_Z 4
_space_group_name_H-M_alt 'C 1 2/c 1'
_space_group_IT_number 15
loop_
_space_group_symop_id
_space_group_symop_operation_xyz
1 'x, -y, z+1/2'
2 '-x, -y, -z'
3 '-x, y, -z+1/2'
4 'x, y, z'
5 'x+1/2, -y+1/2, z+1/2'
6 '-x+1/2, -y+1/2, -z'
7 '-x+1/2, y+1/2, -z+1/2'
8 'x+1/2, y+1/2, z'
loop_
_atom_type_symbol
_atom_type_oxidation_number
Fe2+ 2
C3+ 3
O2- -2
H1+ 1
loop_
_atom_site_label
_atom_site_type_symbol
_atom_site_symmetry_multiplicity
_atom_site_Wyckoff_symbol
_atom_site_fract_x
_atom_site_fract_y
_atom_site_fract_z
_atom_site_B_iso_or_equiv
_atom_site_occupancy

```

```

Fe1 Fe2+ 4 e 0 0.1704(15) 0.25 1.44(2) 1.
C1 C3+ 8 f 0.0499(3) 0.6684(7) 0.3511(4) 1.27(5) 1.
O1 O2- 8 f 0.0848(3) 0.4694(5) 0.4227(3) 1.66(5) 1.
O2 O2- 8 f 0.0863(3) 0.8716(5) 0.4236(3) 1.80(5) 1.
O3 O2- 8 f 0.1797(3) 0.1777(6) 0.2573(3) 2.17(5) 1.
H1 H1+ 8 f 0.263(5) 0.091(12) 0.349(7) 8.2(23) 1.
H2 H1+ 8 f 0.167(5) 0.130(10) 0.156(4) 3.5(12) 1.
loop_
_atom_site_aniso_label
_atom_site_aniso_type_symbol
_atom_site_aniso_U_11
_atom_site_aniso_U_22
_atom_site_aniso_U_33
_atom_site_aniso_U_12
_atom_site_aniso_U_13
_atom_site_aniso_U_23
Fe1 Fe2+ 0.0248(4) 0.0097(3) 0.0162(4) 0. 0.0107(3) 0.
C1 C3+ 0.0255(14) 0.0153(14) 0.0133(12) 0.0018(12) 0.0078(11) 0.0013(11)
O1 O2- 0.0330(16) 0.0126(14) 0.0148(12) -0.0010(12) 0.0111(12) -0.0018(11)
O2 O2- 0.0272(15) 0.0336(17) 0.0183(13) 0.0050(15) 0.0126(12) 0.0036(14)
O3 O2- 0.0172(17) 0.0152(17) 0.0137(17) -0.0001(16) 0.0086(15) -0.0003(16)
#End of TTdata_161344-ICSD

```

## IRON (II) OXALATE-HUMBOLDTINE

```

data_global
_chemical_name_mineral 'Humboldtine'
loop_
_publ_author_name
'Echigo T'
'Kimata M'
_journal_name_full 'Physics and Chemistry of Minerals'
_journal_volume 35
_journal_year 2008
_journal_page_first 467
_journal_page_last 475
_publ_section_title
;
Single-crystal X-ray diffraction and spectroscopic studies on
humboldtine and lindbergite: weak Jahn-Teller effect of Fe2+ ion
;
_database_code_amcsd 0019940
_chemical_compound_source 'Synthetic'
_chemical_formula_sum 'Fe C2 O6 H4'
_cell_length_a 12.011
_cell_length_b 5.557
_cell_length_c 9.920
_cell_angle_alpha 90
_cell_angle_beta 128.53
_cell_angle_gamma 90

```

```

_cell_volume 517.958
_exptl_crystal_density_diffn    2.307
_symmetry_space_group_name_H-M 'C 1 2/c 1'
loop_
_space_group_symop_operation_xyz
  'x,y,z'
  '1/2+x,1/2+y,z'
  'x,-y,1/2+z'
  '1/2+x,1/2-y,1/2+z'
  '-x,y,1/2-z'
  '1/2-x,1/2+y,1/2-z'
  '-x,-y,-z'
  '1/2-x,1/2-y,-z'
loop_
_atom_site_label
_atom_site_fract_x
_atom_site_fract_y
_atom_site_fract_z
_atom_site_U_iso_or_equiv
Fe 0.00000 0.17040 0.25000 0.01824
C 0.04990 0.66840 0.35110 0.01608
O1 0.08480 0.46940 0.42270 0.02102
O2 0.08630 0.87160 0.42360 0.02280
O3 0.17970 0.17770 0.25730 0.02748
H1 0.26300 0.09100 0.34900 0.10385
H2 0.16700 0.13000 0.15600 0.04433
loop_
_atom_site_aniso_label
_atom_site_aniso_U_11
_atom_site_aniso_U_22
_atom_site_aniso_U_33
_atom_site_aniso_U_12
_atom_site_aniso_U_13
_atom_site_aniso_U_23
Fe 0.02480 0.00970 0.01620 0.00000 0.01070 0.00000
C 0.02550 0.01530 0.01330 0.00180 0.00780 0.00130
O1 0.03300 0.01260 0.01480 -0.00100 0.01110 -0.00180
O2 0.02720 0.03360 0.01830 0.00500 0.01260 0.00360
O3 0.01720 0.01520 0.01370 -0.00010 0.00860 -0.00030

```

## MAGHEMITE

```

data_global
_chemical_name_mineral 'Maghemite'
loop_
_publ_author_name
'Pecharroman C'
'Gonzalez-Carreno T'
'Iglesias J E'

```

```

_journal_name_full 'Physics and Chemistry of Minerals'
_journal_volume 22
_journal_year 1995
_journal_page_first 21
_journal_page_last 29
_publ_section_title
;
The infrared dielectric properties of maghemite, gamma-Fe2O3,
from reflectance measurement on pressed powders
Sample: a) idealized
;
_database_code_amcsd 0007898
_chemical_formula_sum 'Fe2.667 O4'
_cell_length_a 8.33
_cell_length_b 8.33
_cell_length_c 8.33
_cell_angle_alpha 90
_cell_angle_beta 90
_cell_angle_gamma 90
_cell_volume 578.010
_exptl_crystal_density_diffn 4.894
_symmetry_space_group_name_H-M 'F d 3 m'
loop_
_space_group_symop_operation_xyz
  'x,y,z'
  'x,1/2+y,1/2+z'
  '1/2+x,y,1/2+z'
  '1/2+x,1/2+y,z'
  '3/4+z,1/2-x,1/4+y'
  '3/4+z,-x,3/4+y'
  '1/4+z,1/2-x,3/4+y'
  '1/4+z,-x,1/4+y'
  '3/4-y,1/2+z,1/4-x'
  '3/4-y,+z,3/4-x'
  '1/4-y,1/2+z,3/4-x'
  '1/4-y,+z,1/4-x'
  '3/4+x,1/2-y,1/4+z'
  '3/4+x,-y,3/4+z'
  '1/4+x,1/2-y,3/4+z'
  '1/4+x,-y,1/4+z'
  '3/4-z,1/2+x,1/4-y'
  '3/4-z,+x,3/4-y'
  '1/4-z,1/2+x,3/4-y'
  '1/4-z,+x,1/4-y'
  '3/4+y,1/2-z,1/4+x'
  '3/4+y,-z,3/4+x'
  '1/4+y,1/2-z,3/4+x'
  '1/4+y,-z,1/4+x'
  '3/4-x,1/2+y,1/4-z'

```



$'3/4-x,y,3/4-z'$   
 $'1/4-x,1/2+y,3/4-z'$   
 $'1/4-x,y,1/4-z'$   
 $'1/2+x,3/4-z,1/4-y'$   
 $'1/2+x,1/4-z,3/4-y'$   
 $'+x,3/4-z,3/4-y'$   
 $'+x,1/4-z,1/4-y'$   
 $'1/2-z,3/4+y,1/4+x'$   
 $'1/2-z,1/4+y,3/4+x'$   
 $'-z,3/4+y,3/4+x'$   
 $'-z,1/4+y,1/4+x'$   
 $'1/2+y,3/4-x,1/4-z'$   
 $'1/2+y,1/4-x,3/4-z'$   
 $'+y,3/4-x,3/4-z'$   
 $'+y,1/4-x,1/4-z'$   
 $'1/2-x,3/4+z,1/4+y'$   
 $'1/2-x,1/4+z,3/4+y'$   
 $'-x,3/4+z,3/4+y'$   
 $'-x,1/4+z,1/4+y'$   
 $'1/2+z,3/4-y,1/4-x'$   
 $'1/2+z,1/4-y,3/4-x'$   
 $'+z,3/4-y,3/4-x'$   
 $'+z,1/4-y,1/4-x'$   
 $'1/2-y,3/4+x,1/4+z'$   
 $'1/2-y,1/4+x,3/4+z'$   
 $'-y,3/4+x,3/4+z'$   
 $'-y,1/4+x,1/4+z'$   
 $'x,1/2+z,1/2+y'$   
 $'x,+z,+y'$   
 $'1/2+x,1/2+z,+y'$   
 $'1/2+x,+z,1/2+y'$   
 $'-z,1/2-y,1/2-x'$   
 $'-z,-y,-x'$   
 $'1/2-z,1/2-y,-x'$   
 $'1/2-z,-y,1/2-x'$   
 $'y,1/2+x,1/2+z'$   
 $'y,+x,+z'$   
 $'1/2+y,1/2+x,+z'$   
 $'1/2+y,+x,1/2+z'$   
 $'-x,1/2-z,1/2-y'$   
 $'-x,-z,-y'$   
 $'1/2-x,1/2-z,-y'$   
 $'1/2-x,-z,1/2-y'$   
 $'z,1/2+y,1/2+x'$   
 $'z,+y,+x'$   
 $'1/2+z,1/2+y,+x'$   
 $'1/2+z,+y,1/2+x'$   
 $'-y,1/2-x,1/2-z'$   
 $'-y,-x,-z'$

$'1/2-y,1/2-x,-z'$   
 $'1/2-y,-x,1/2-z'$   
 $'3/4+z,1/4+x,1/2-y'$   
 $'3/4+z,3/4+x,-y'$   
 $'1/4+z,1/4+x,-y'$   
 $'1/4+z,3/4+x,1/2-y'$   
 $'3/4-y,1/4-z,1/2+x'$   
 $'3/4-y,3/4-z,+x'$   
 $'1/4-y,1/4-z,+x'$   
 $'1/4-y,3/4-z,1/2+x'$   
 $'3/4+x,1/4+y,1/2-z'$   
 $'3/4+x,3/4+y,-z'$   
 $'1/4+x,1/4+y,-z'$   
 $'1/4+x,3/4+y,1/2-z'$   
 $'3/4-z,1/4-x,1/2+y'$   
 $'3/4-z,3/4-x,+y'$   
 $'1/4-z,1/4-x,+y'$   
 $'1/4-z,3/4-x,1/2+y'$   
 $'3/4+y,1/4+z,1/2-x'$   
 $'3/4+y,3/4+z,-x'$   
 $'1/4+y,1/4+z,-x'$   
 $'1/4+y,3/4+z,1/2-x'$   
 $'3/4-x,1/4-y,1/2+z'$   
 $'3/4-x,3/4-y,+z'$   
 $'1/4-x,1/4-y,+z'$   
 $'1/4-x,3/4-y,1/2+z'$   
 $'-z,3/4+x,3/4+y'$   
 $'-z,1/4+x,1/4+y'$   
 $'1/2-z,3/4+x,1/4+y'$   
 $'1/2-z,1/4+x,3/4+y'$   
 $'y,3/4-z,3/4-x'$   
 $'y,1/4-z,1/4-x'$   
 $'1/2+y,3/4-z,1/4-x'$   
 $'1/2+y,1/4-z,3/4-x'$   
 $'-x,3/4+y,3/4+z'$   
 $'-x,1/4+y,1/4+z'$   
 $'1/2-x,3/4+y,1/4+z'$   
 $'1/2-x,1/4+y,3/4+z'$   
 $'z,3/4-x,3/4-y'$   
 $'z,1/4-x,1/4-y'$   
 $'1/2+z,3/4-x,1/4-y'$   
 $'1/2+z,1/4-x,3/4-y'$   
 $'-y,3/4+z,3/4+x'$   
 $'-y,1/4+z,1/4+x'$   
 $'1/2-y,3/4+z,1/4+x'$   
 $'1/2-y,1/4+z,3/4+x'$   
 $'x,3/4-y,3/4-z'$   
 $'x,1/4-y,1/4-z'$   
 $'1/2+x,3/4-y,1/4-z'$

$'1/2+x,1/4-y,3/4-z'$   
 $'1/4-x,1/2+z,3/4-y'$   
 $'1/4-x,+z,1/4-y'$   
 $'3/4-x,1/2+z,1/4-y'$   
 $'3/4-x,+z,3/4-y'$   
 $'1/4+z,1/2-y,3/4+x'$   
 $'1/4+z,-y,1/4+x'$   
 $'3/4+z,1/2-y,1/4+x'$   
 $'3/4+z,-y,3/4+x'$   
 $'1/4-y,1/2+x,3/4-z'$   
 $'1/4-y,+x,1/4-z'$   
 $'3/4-y,1/2+x,1/4-z'$   
 $'3/4-y,+x,3/4-z'$   
 $'1/4+x,1/2-z,3/4+y'$   
 $'1/4+x,-z,1/4+y'$   
 $'3/4+x,1/2-z,1/4+y'$   
 $'3/4+x,-z,3/4+y'$   
 $'1/4-z,1/2+y,3/4-x'$   
 $'1/4-z,+y,1/4-x'$   
 $'3/4-z,1/2+y,1/4-x'$   
 $'3/4-z,+y,3/4-x'$   
 $'1/4+y,1/2-x,3/4+z'$   
 $'1/4+y,-x,1/4+z'$   
 $'3/4+y,1/2-x,1/4+z'$   
 $'3/4+y,-x,3/4+z'$   
 $'3/4-x,3/4-z,y'$   
 $'3/4-x,1/4-z,1/2+y'$   
 $'1/4-x,3/4-z,1/2+y'$   
 $'1/4-x,1/4-z,y'$   
 $'3/4+z,3/4+y,-x'$   
 $'3/4+z,1/4+y,1/2-x'$   
 $'1/4+z,3/4+y,1/2-x'$   
 $'1/4+z,1/4+y,-x'$   
 $'3/4-y,3/4-x,z'$   
 $'3/4-y,1/4-x,1/2+z'$   
 $'1/4-y,3/4-x,1/2+z'$   
 $'1/4-y,1/4-x,z'$   
 $'3/4+x,3/4+z,-y'$   
 $'3/4+x,1/4+z,1/2-y'$   
 $'1/4+x,3/4+z,1/2-y'$   
 $'1/4+x,1/4+z,-y'$   
 $'3/4-z,3/4-y,x'$   
 $'3/4-z,1/4-y,1/2+x'$   
 $'1/4-z,3/4-y,1/2+x'$   
 $'1/4-z,1/4-y,x'$   
 $'3/4+y,3/4+x,-z'$   
 $'3/4+y,1/4+x,1/2-z'$   
 $'1/4+y,3/4+x,1/2-z'$   
 $'1/4+y,1/4+x,-z'$

```

'-z,-x,-y'
'-z,1/2-x,1/2-y'
'1/2-z,-x,1/2-y'
'1/2-z,1/2-x,-y'
'y,z,x'
'y,1/2+z,1/2+x'
'1/2+y,z,1/2+x'
'1/2+y,1/2+z,x'
'-x,-y,-z'
'-x,1/2-y,1/2-z'
'1/2-x,-y,1/2-z'
'1/2-x,1/2-y,-z'
'z,x,y'
'z,1/2+x,1/2+y'
'1/2+z,x,1/2+y'
'1/2+z,1/2+x,y'
'-y,-z,-x'
'-y,1/2-z,1/2-x'
'1/2-y,-z,1/2-x'
'1/2-y,1/2-z,-x'
loop_
_atom_site_label
_atom_site_fract_x
_atom_site_fract_y
_atom_site_fract_z
_atom_site_occupancy
Fe-oct 0.50000 0.50000 0.50000 0.83333
Fe-tet 0.12500 0.12500 0.12500 1.00000
O 0.25000 0.25000 0.25000 1.00000

```

## ILMENITE

```

data_global
_chemical_name_mineral 'Ilmenite'
loop_
_publ_author_name
'Wechsler B A'
'Prewitt C T'
_journal_name_full 'American Mineralogist'
_journal_volume 69
_journal_year 1984
_journal_page_first 176
_journal_page_last 185
_publ_section_title
;
Crystal structure of ilmenite (FeTiO3) at high temperature and high pressure
P = 25.4 kbar
;
_database_code_amcsd 0000932

```

```

_chemical_formula_sum 'Fe Ti O3'
_cell_length_a 5.0691
_cell_length_b 5.0691
_cell_length_c 13.9849
_cell_angle_alpha 90
_cell_angle_beta 90
_cell_angle_gamma 120
_cell_volume 311.209
_exptl_crystal_density_diffn 4.857
_symmetry_space_group_name_H-M 'R -3'
loop_
_space_group_symop_operation_xyz
  'x,y,z'
  '2/3+x,1/3+y,1/3+z'
  '1/3+x,2/3+y,2/3+z'
  'y,-x+y,-z'
  '2/3+y,1/3-x+y,1/3-z'
  '1/3+y,2/3-x+y,2/3-z'
  '-x+y,-x,z'
  '2/3-x+y,1/3-x,1/3+z'
  '1/3-x+y,2/3-x,2/3+z'
  '-x,-y,-z'
  '2/3-x,1/3-y,1/3-z'
  '1/3-x,2/3-y,2/3-z'
  '-y,x-y,z'
  '2/3-y,1/3+x-y,1/3+z'
  '1/3-y,2/3+x-y,2/3+z'
  'x-y,x,-z'
  '2/3+x-y,1/3+x,1/3-z'
  '1/3+x-y,2/3+x,2/3-z'
loop_
_atom_site_label
_atom_site_fract_x
_atom_site_fract_y
_atom_site_fract_z
_atom_site_U_iso_or_equiv
Fe 0.00000 0.00000 0.35562 0.00861
Ti 0.00000 0.00000 0.14637 0.00671
O 0.31596 0.02301 0.24537 0.00773

```
